# Supplementary material
Source: PubMed Central journal article supplement (PMC7551212)
Supplement: jamapediatr-e203231-s001.pdf [file jamapediatr-e203231-s001.pdf]

## Supplementary Online Content

Qiu C, Lin JC, Shi JM, et al. Association between epidural analgesia during labor and risk of autism spectrum disorders in offspring. *JAMA Pediatr*. Published online October 12, 2020. doi:10.1001/jamapediatrics.2020.3231

**eTable 1.** Characteristics of the Cohort at the Time of the Index Pregnancy

**eTable 2.** Associations Between Labor Epidural Analgesia (LEA) Use at Delivery and Risk of Autism Spectrum Disorders (ASD) in Offspring (Randomly Select One Child per Family)

This supplementary material has been provided by the authors to give readers additional information about their work.

**eTable 1.** Characteristics of the Cohort at the Time of the Index Pregnancy

|                                 | Before Weighting |                  |       | After Weighting |               |       |
|---------------------------------|------------------|------------------|-------|-----------------|---------------|-------|
|                                 | LEA unexposed    | LEA Exposed      | SMD*  | LEA unexposed   | LEA Exposed   | SMD*  |
| <b>Characteristics:</b>         | <b>N=38176</b>   | <b>N= 109719</b> |       | N=38311         | N=109664      |       |
| <b>Mean (SD) or N (%)</b>       |                  |                  |       |                 |               |       |
| <b>Maternal Characteristics</b> |                  |                  |       |                 |               |       |
| Age at delivery                 | 30.6 (5.5)       | 29.8 (5.6)       | 0.132 | 30.1 (5.5%)     | 30.0 (5.6%)   | 0.014 |
| Race/Ethnicity (%)              |                  |                  | 0.155 |                 |               | 0.018 |
| Non-Hispanic white              | 8292 (21.7%)     | 29149 (26.6%)    |       | 10003 (26.1%)   | 27869 (25.4%) |       |
| Non-Hispanic black              | 2749 (7.2%)      | 8231 (7.5%)      |       | 2860 (7.5%)     | 8167 (7.4%)   |       |
| Hispanic                        | 21591 (56.6%)    | 53878 (49.1%)    |       | 19185 (50.1%)   | 55801 (50.9%) |       |
| Asian/Pacific Islanders         | 4679 (12.3%)     | 15546 (14.2%)    |       | 993 (2.6%)      | 2813 (2.6%)   |       |
| Others                          | 865 (2.3%)       | 2915 (2.7%)      |       | 5270 (13.8%)    | 15014 (13.7%) |       |
| Parity (%)                      |                  |                  | 0.406 |                 |               | 0.012 |
| 0                               | 8821 (23.1%)     | 39362 (35.9%)    |       | 12254 (32.0%)   | 35679 (32.5%) |       |
| 1                               | 13293 (34.8%)    | 33891 (30.9%)    |       | 12359 (32.3%)   | 35011 (31.9%) |       |
| ≥2                              | 13349 (35%)      | 22962 (20.9%)    |       | 9466 (24.7%)    | 26948 (24.6%) |       |
| Unknown                         | 2713 (7.1%)      | 13504 (12.3%)    |       | 4232 (11.0%)    | 12026 (11.0%) |       |
| Education (%)                   |                  |                  | 0.115 |                 |               | 0.023 |
| ≤High school                    | 13152 (34.5%)    | 31995 (29.2%)    |       | 11341 (29.6%)   | 33326 (30.4%) |       |
| Some College                    | 10988 (28.8%)    | 34343 (31.3%)    |       | 14875 (38.8%)   | 41418 (37.8%) |       |
| College and Post grade          | 13547 (35.5%)    | 42108 (38.4%)    |       | 11648 (30.4%)   | 33612 (30.6%) |       |
| Unknown                         | 489 (1.3%)       | 1273 (1.2%)      |       | 447 (1.2%)      | 1308 (1.2%)   |       |
| Household income (%)            |                  |                  | 0.144 |                 |               | 0.017 |
| < \$30,000                      | 1116 (2.9%)      | 2457 (2.2%)      |       | 916 (2.4%)      | 2645 (2.4%)   |       |
| \$30,000 - \$49,999             | 10453 (27.4%)    | 25233 (23%)      |       | 9066 (23.7%)    | 26407 (24.1%) |       |
| \$50,000 - \$69,999             | 12787 (33.5%)    | 35652 (32.5%)    |       | 12379 (32.3%)   | 35862 (32.7%) |       |
| \$70,000 - \$89,999             | 7835 (20.5%)     | 24884 (22.7%)    |       | 8623 (22.5%)    | 24304 (22.2%) |       |
| ≥ \$90,000                      | 5985 (15.7%)     | 21493 (19.6%)    |       | 7327 (19.1%)    | 20446 (18.6%) |       |
| History of comorbidity (%)      | 5498 (14.4%)     | 19056 (17.4%)    | 0.081 | 6324 (16.5%)    | 18220 (16.6%) | 0.003 |
| Diabetes during pregnancy (%)   |                  |                  | 0.053 |                 |               | 0.004 |
| Gestational diabetes            | 3172 (8.3%)      | 8663 (7.9%)      |       | 34348 (89.7%)   | 98200 (89.5%) |       |

|                                        |                |                |       |              |               |        |
|----------------------------------------|----------------|----------------|-------|--------------|---------------|--------|
| Pre-gestational diabetes               | 726 (1.9%)     | 2934 (2.6%)    |       | 3012 (7.9%)  | 8749 (8.0%)   |        |
| Smoking during pregnancy (%)           | 188 (0.5%)     | 939 (0.9%)     | 0.044 | 951 (2.5%)   | 2715 (2.5%)   |        |
| Pre-eclampsia/eclampsia (%)            | 823 (2.2%)     | 3777 (3.4%)    | 0.078 | 279 (0.7%)   | 833 (0.8%)    | 0.004  |
| Pre-pregnancy BMI (kg/m <sup>2</sup> ) | 26.1 (5.7)     | 26.4 (5.9)     | 0.042 | 1171 (3.1%)  | 3412 (3.1%)   | 0.003  |
| Gestational weight gain (lbs)          | 25.9 (13.6)    | 27.8 (13.9)    | 0.136 | 26.3 (5.9)   | 26.3 (5.8)    | 0.012  |
|                                        |                |                |       | 27.3 (13.9)  | 27.3 (13.8)   | 0.001  |
| <b>Child Characteristics</b>           |                |                |       | 3344 (484.8) | 3344 (480.0)  | <0.001 |
| Birthweight (g)                        | 3316.2 (495.3) | 3354.5 (475.7) | 0.079 | 38.9 (1.5)   | 38.9 (1.5)    | 0.004  |
| Gestational age at delivery (wks)      | 38.7 (1.6)     | 38.9 (1.5)     | 0.126 | 4827 (12.6%) | 13840 (12.6%) | 0.001  |
| Presence of any birth defect (%)       | 4447 (11.6%)   | 14159 (12.9%)  | 0.038 | 30.1 (5.5%)  | 30.0 (5.6%)   | 0.014  |
|                                        |                |                |       |              |               |        |
| Medical Center (%)                     |                |                | 0.268 |              |               | 0.029  |
| Baldwin Park                           | 3021 (7.9%)    | 9605 (8.8%)    |       | 3235 (8.4%)  | 9356 (8.5%)   |        |
| Bellflower                             | 4750 (12.4%)   | 10628 (9.7%)   |       | 3945 (10.3%) | 11373 (10.4%) |        |
| Fontana                                | 4589 (12.0%)   | 11488 (10.5%)  |       | 3985 (10.4%) | 11830 (10.8%) |        |
| Irvine                                 | 2162 (5.7%)    | 7861 (7.2%)    |       | 2724 (7.1%)  | 7473 (6.8%)   |        |
| Los Angeles                            | 2593 (6.8%)    | 7262 (6.6%)    |       | 2560 (6.7%)  | 7319 (6.7%)   |        |
| Moreno Valley                          | 898 (2.4%)     | 1996 (1.8%)    |       | 728 (1.9%)   | 2142 (2.0%)   |        |
| Ontario                                | 1020 (2.7%)    | 3806 (3.5%)    |       | 1228 (3.2%)  | 3578 (3.3%)   |        |
| Orange County                          | 2808 (7.4%)    | 9553 (8.7%)    |       | 3297 (8.6%)  | 9201 (8.4%)   |        |
| Panorama City                          | 2202 (5.8%)    | 7232 (6.6%)    |       | 2320 (6.1%)  | 6972 (6.4%)   |        |
| Riverside                              | 4789 (12.5%)   | 8484 (7.7%)    |       | 3412 (8.9%)  | 9845 (9.0%)   |        |
| San Diego                              | 3061 (8.0%)    | 14599 (13.3%)  |       | 4826 (12.6%) | 13142 (12.0%) |        |
| South Bay                              | 2383 (6.2%)    | 6778 (6.2%)    |       | 2396 (6.3%)  | 6809 (6.2%)   |        |
| West LA                                | 2134 (5.6%)    | 5186 (4.7%)    |       | 1899 (5.0%)  | 5444 (5.0%)   |        |
| Woodland Hills                         | 1766 (4.6%)    | 5241 (4.8%)    |       | 1756 (4.6%)  | 5180 (4.7%)   |        |

\*SMD: standardized mean difference

**eTable 2.** Associations Between Labor Epidural Analgesia (LEA) Use at Delivery and Risk of Autism Spectrum Disorders (ASD) in Offspring (Randomly Select One Child per Family)

|                                           | <b>No. with ASD/Total</b> | <b>Bivariable<sup>a</sup></b> | <b>Adjusting for Covariates<sup>b</sup></b> |
|-------------------------------------------|---------------------------|-------------------------------|---------------------------------------------|
|                                           |                           | <b>HR (95% CI)</b>            | <b>HR (95% CI)</b>                          |
| <b>Epidural</b>                           |                           |                               |                                             |
| No                                        | 386/30529                 | 1.0<br>(Reference)            | 1.0 (Reference)                             |
| Yes                                       | 1669/89444                | 1.45 (1.19-1.77)              | 1.42 (1.23-1.64)                            |
| <b>Epidural Duration</b>                  |                           |                               |                                             |
| No Epidural                               | 386/30529                 | 1.0<br>(Reference)            | 1.0 (Reference)                             |
| <4 hrs                                    | 407/25257                 | 1.25 (1.09-1.44)              | 1.37 (1.15-1.63)                            |
| 4-8 hrs                                   | 752/41019                 | 1.43 (1.27-1.62)              | 1.42 (1.22-1.66)                            |
| >8 hrs                                    | 510/23168                 | 1.70 (1.49-1.95)              | 1.49 (1.25-1.78)                            |
| Linear trend (per 4 hour)<br><sup>c</sup> | 1669/89444                | 1.10 (1.06-1.14)              | 1.05 (1.00-1.11)                            |

<sup>a</sup> LEA was analyzed individually where only birth year was adjusted in the model.

<sup>b</sup> Covariates included birth year, maternal age at delivery, parity, race/ethnicity, education, household income, history of comorbidity, diabetes during pregnancy, smoking during pregnancy, pre-eclampsia/eclampsia, pre-pregnancy BMI, gestational weight gain, gestational age at delivery, birth weight, and medical center.

<sup>c</sup> Linear trend is defined as LEA duration as a continuous variable within LEA group
